# Supplementary material
Source: PubMed Central journal article supplement (PMC5362740)
Supplement: es6b05318_si_001.pdf [file es6b05318_si_001.pdf]

## Supporting Information

### Medium-chain Chlorinated Paraffins (CPs) dominate in Australian sewage sludge

Sicco H. Brandsma <sup>a\*</sup>, Louise van Mourik <sup>a, b</sup>, Jake W. O'Brien <sup>b</sup>, Geoff Eaglesham <sup>b</sup>, Pim. E. G. Leonards <sup>a</sup>, Jacob de Boer <sup>a</sup>, Christie Gallen <sup>b</sup>, Jochen Mueller <sup>b</sup>, Caroline Gaus <sup>b</sup>, Christian Bogdal <sup>c</sup>

<sup>a</sup> VU University, Department of Environmental and Health, De Boelelaan 1087, 1081 HV Amsterdam, The Netherlands

<sup>b</sup> The University of Queensland, The National Research Centre for Environmental Toxicology (Entox), 39 Kessels Road, Coopers Plains, QLD 4108, Australia

<sup>c</sup> Institute for Chemical and Bioengineering, ETH Zürich, Vladimir-Prelog-Weg 1, CH-8093 Zürich, Switzerland

\*Corresponding authors. Tel.: 31 20 59 89566; Fax: 31 20 59 89552; Email: [sicco.brandsma@vu.nl](mailto:sicco.brandsma@vu.nl)

Page number: 19

Figure number: 7

Table number: 10

## Materials

The following eight commercial available CP standard mixtures were used for the deconvolution of the SCCP, MCCP and LCCP pattern in the 15 sewage sludge samples;

- Chlorinated paraffin C10-C13 51.5% Cl (SCCP 51.5% Cl)
- Chlorinated paraffin C10-C13 55.5% Cl (SCCP 55.5% Cl)
- Chlorinated paraffin C10-C13 63% Cl (SCCP 63% Cl)
- Chlorinated paraffin C14-C17 42% Cl (MCCP 42% Cl)
- Chlorinated paraffin C14-C17 52% Cl (MCCP 52% Cl)
- Chlorinated paraffin C14-C17 57% Cl (MCCP 57% Cl)
- Chlorinated paraffin C18-C20 36% Cl (LCCP 36% Cl)
- Chlorinated paraffin C18-C20 49% Cl (LCCP 49% Cl)

The concentration of the eight commercial CP standard mixtures was 100 ng/ $\mu$ L and purchased from Dr. Ehrenstorfer GmbH (Augsburg, Germany). All solvents and chemicals used were HPLC analysis grade. *N*-hexane, acetonitrile (ACN), acetone and dichloromethane (DCM) were used for extraction cleanup and analysis. Mass labeled ( $^{13}\text{C}_6$ ) pentachlorophenol was used as injection standard and was purchased from Sigma Aldrich (Sunnyvale, CA, USA). Silicagel (63-200  $\mu\text{m}$ ) was also purchased from Sigma Aldrich (Sunnyvale, CA, USA), aluminum oxide (MP EcoChrom<sup>TM</sup> Alumina B-Super I from MP Biomedical (Seven Hills, NSW, Australia) and Chem tube-hydromatrix was purchased from Agilent Technologies.

## Sampling collection

Sewage sludge sampling occurred from the 4th March – 1st May 2014. Local sewage sludge samples were collected by Entox and samples from interstate were collected by WWTP employees. Samples were collected following the final dewatering step (typically the belt press or centrifuge) to represent the final sewage sludge product that is removed from each WWTP. Eight sub samples were collected at one time point from most sites. Sites S10 and S15 collected subsamples over longer time periods (representing several days to approximately one month) to obtain the most representative sample of a production batch. The sample from Site S11 was collected in a sludge lagoon that represented approximately a year of sludge accumulation. At one site located in South Australia (S9), samples were also collected from a stockpile dating from December 2012 (S12). Samples were collected in glass jars that were pre-rinsed with acetone and *n*-hexane and were refrigerated or frozen and couriered on an overnight service to Entox. Sewage sludge sub-samples from each site were mixed vigorously whilst wet and freeze-dried. Freeze-dried sub-samples were then manually ground into a fine powder and pooled equally to make one pooled sample per site.

## Deconvolution and quantification

The CP pattern measured in each sample was reconstructed into a linear combination of patterns of CPs of the technical mixtures using a deconvolution algorithm. First, the *m/z* values of CP congener groups in the analysed sample (*S*) and in the technical CP mixtures (*Y*) were extracted from the full scan spectra and peak areas were integrated. After correcting for the injection standard ( $^{13}\text{C}_6$ -PCP), the peak area of each CP congener group (e.g.  $\text{C}_{10}\text{C}_{14}$ ,  $\text{C}_{10}\text{C}_{15}$ ,  $\text{C}_{10}\text{C}_{16}$  etc.) was divided by the total sum of the peak areas of all congeners within each CP category (SCCPs, MCCPs or LCCPs). The sum of all CP congeners group within the corresponding CP category represents the relative contribution of each congener group to their CP category, which is also referred to as the congener group pattern (see Figure 2A for an example for SCCPs in sewage sludge sample S2). Also for the SCCP, MCCP, and LCCP technical formulations with known concentrations, their congener group patterns were calculated by the normalization procedure. The basic principle of the deconvolution procedure consists in assuming that for each CP category, its congener group pattern can be decomposed into a linear combination of the congener group patterns of

the technical formulations of the corresponding CP category. Thus, the following system of linear equations is obtained:  $S = Y_1 \cdot X_1 + Y_2 \cdot X_2 + Y_3 \cdot X_3$  whereby, the known  $S = [\dots]$  and  $Y = [\dots]$  are the normalized CP congener group patterns of the sample and technical CP formulations, respectively ( $S/Y$  are vector/matrices with 34 lines corresponding to the 34 CP congener groups monitored here for the SCCPs).  $X_1, X_2, X_3$  are three unknowns of the overdetermined equation system and represent the contribution of each of the three technical formulations (51.5%, 55%, 63% CI for the SCCPs) used to reconstruct (deconvolve) the CP congener pattern of the sample (see Figure 2B for an example of the reconstructed CP pattern in sewage sludge sample S2). The overdetermined equation system could be solved (i.e.  $X_1, X_2$ , and  $X_3$  estimated), following a least-squares approximation procedure in MATLAB with the following function  $X = \text{lsqnonneg}(Y, S)$ . This function allows no negative values for  $X_1, X_2$  and  $X_3$ . The  $X_1, X_2$  and  $X_3$  values were normalized to 1 in MATLAB using the following function ( $X = X / \text{norm}(X, 1)$ ). The reconstructed CP pattern (i.e. the pattern recomposed with the estimated values of  $X_1, X_2$  and  $X_3$ ), was compared to the initial CP pattern of the analysed sample to determine the goodness of fit ( $R^2$ ). Quantification was performed by external calibration standards, considering the known concentration of the technical CP mixtures and the instrumental response corrected for the contribution of the estimated  $X_1, X_2$  and  $X_3$  values of each of the three technical mixtures calculated for each sewage sludge sample.

Table S1. Details of the participating WWTPs

| WWTP | Region                  | Connected population | Population Equivalents | Inflow volume (ML/d) | Biosolid Production (dry t/yr) | Source                                    | Sludge treatment                                   | Sampling point/s                   |
|------|-------------------------|----------------------|------------------------|----------------------|--------------------------------|-------------------------------------------|----------------------------------------------------|------------------------------------|
| S1   | South-East Queensland   | 30,000               | 34,000                 | 6                    | 688                            | R; T                                      | Activated sludge                                   | Belt press                         |
| S2   | South-East Queensland   | 455,000*             | 807,000                | 130                  | 9198                           | R; T                                      | Anaerobic digestors                                | Centrifuge                         |
| S3   | North Queensland        | 25,000               | 31,000                 | 6                    | 475                            | R                                         | Aerobic digestors                                  | Belt press                         |
| S4   | Northern Australia      | 32,100               |                        | 18                   | 3103                           | 66% R; 33% C; 1% I                        | Flocculation, chemically assisted sludge treatment | Centrifuge                         |
| S5   | South-East Queensland   |                      | 200,000                | 45                   | 4508                           | R, I, T                                   | Activated sludge                                   | Belt press                         |
| S6   | South-East Queensland   | 30,000               |                        | 5                    | 566                            | R; I; T                                   | Activated sludge                                   | Centrifuge                         |
| S14  | North Queensland        | 55,000               | 72,000                 | 20                   | 964                            | 90% R; 8% I; 2% T                         | Aerobic digestors                                  | Belt press                         |
| S16  | North Queensland        | 27,000               | 25,000                 | 5                    | 1091                           | R                                         | Activated sludge / bioreactor                      | Belt press                         |
| S7   | Central New South Wales |                      | 115,000                | 27                   | 1183                           | R; I; T                                   | Aerobic digestors                                  | Centrifuge                         |
| S9   | Southern Australia      | >600,000             | 850,000                | 145                  | 22995                          | 90% R; 8-10% T,I                          | Anaerobic digestors                                | Centrifuge                         |
| S10  | South-East Queensland   | 285,000              | 325,000                | 50                   | 4198                           | 85% R; 15% T                              | Thermal hydrolysis then anaerobic digestors        | Centrifuge                         |
| S11  | Central New South Wales |                      | 32,000                 | 7                    | 423                            | R; I; T                                   | Activated sludge                                   | Mobile centrifuge at sludge lagoon |
| S13  | Western Australia       | >500,000             |                        | 135                  | 7884                           | Primarily R                               | Anaerobic digestors                                | Centrifuge                         |
| S15  | North Queensland        | 51,000               | 68,600                 | 24                   | 1752                           | 70% R; 30% I (40% infiltration currently) | Aerobic digestors                                  | Belt press                         |
| S12  | Southern Australia      | >600,000             | 850,000                | 145                  |                                | 90% R; 8-10% T,I                          | Anaerobic digestors                                | Stockpile 2012                     |

\*Population estimate obtained from O'Brien et al. 2014; R=residential, I=industrial, T=trade waste, C=commercial; ML/d = megalitres per day; t/d = tonnes per day

Table S2. Calculated chlorination degree for the eight technical CP mixtures.

|              | calculated Cl-degree |
|--------------|----------------------|
| SCCP (51.5%) | 55.9% Cl             |
| SCCP (55.5%) | 58.2% Cl             |
| SCCP (63%)   | 63.7% Cl             |
| MCCP (42%)   | 49.4% Cl             |
| MCCP (52%)   | 54.2% Cl             |
| MCCP (57%)   | 57.5% Cl             |
| LCCP (36%)   | 41.5% Cl             |
| LCCP (49%)   | 49.0% Cl             |

Table S3. The results of a triplicate recovery experiments containing the three technical SCCP formulations which were extracted, cleaned and analysed in conjunction with the sewage sludge samples. The recoveries were only corrected by the injection standard ( $^{13}\text{C}_6\text{-PCP}$ ). Results for the MCCPs and LCCPs are given in the Supplementary Table S2 and S4.

| Sample | CPs          | measured conc.<br>(ng abs) | spiked conc.<br>(ng abs) | recovery<br>(%) | R <sup>2</sup> of<br>deconvolution |
|--------|--------------|----------------------------|--------------------------|-----------------|------------------------------------|
| 1      | SCCP 63%Cl   | 123                        | 141                      | 87%             | 0.95                               |
|        | SCCP 55.5%Cl | 150                        | 141                      | 106%            |                                    |
|        | SCCP 51.5%Cl | 101                        | 141                      | 72%             |                                    |
|        | Total SCCPs  | 374                        | 424                      | 88%             |                                    |
| 2      | SCCP 63%Cl   | 106                        | 141                      | 75%             | 0.95                               |
|        | SCCP 55.5%Cl | 154                        | 141                      | 109%            |                                    |
|        | SCCP 51.5%Cl | 79                         | 141                      | 56%             |                                    |
|        | Total SCCPs  | 339                        | 424                      | 80%             |                                    |
| 3      | SCCP 63%Cl   | 93                         | 141                      | 66%             | 0.94                               |
|        | SCCP 55.5%Cl | 112                        | 141                      | 79%             |                                    |
|        | SCCP 51.5%Cl | 83                         | 141                      | 59%             |                                    |
|        | Total SCCPs  | 288                        | 424                      | 68%             |                                    |

Table S4. The results of a triplicate spike experiments with three technical SCCP formulations for four different sewage sludge samples. The recovery was calculated by subtracting the values observed in the samples from the spiked samples. The values were only corrected by the injection standard ( $^{13}\text{C-PCP}$ ). Results for the MCCPs and LCCPs are given in the Supplementary Table S3 and S5.

| Sample | CPs          | measured conc.<br>(ng abs) | spiked conc.<br>(ng abs) | recovery<br>(%) | R <sup>2</sup> of<br>deconvolution |
|--------|--------------|----------------------------|--------------------------|-----------------|------------------------------------|
| 1      | SCCP 63%Cl   | 114                        | 121                      | 94%             | 0.97                               |
|        | SCCP 55.5%Cl | 141                        | 121                      | 116%            |                                    |
|        | SCCP 51.5%Cl | 51                         | 121                      | 42%             |                                    |
|        | Total SCCPs  | 305                        | 363                      | 84%             |                                    |
| 2      | SCCP 63%Cl   | 115                        | 121                      | 95%             | 0.97                               |
|        | SCCP 55.5%Cl | 182                        | 121                      | 150%            |                                    |
|        | SCCP 51.5%Cl | 46                         | 121                      | 38%             |                                    |
|        | Total SCCPs  | 343                        | 363                      | 94%             |                                    |
| 3      | SCCP 63%Cl   | 129                        | 121                      | 106%            | 0.94                               |
|        | SCCP 55.5%Cl | 143                        | 121                      | 118%            |                                    |
|        | SCCP 51.5%Cl | 83                         | 121                      | 69%             |                                    |
|        | Total SCCPs  | 355                        | 363                      | 98%             |                                    |
| 4      | SCCP 63%Cl   | 131                        | 121                      | 108%            | 0.97                               |
|        | SCCP 55.5%Cl | 139                        | 121                      | 115%            |                                    |
|        | SCCP 51.5%Cl | 88                         | 121                      | 73%             |                                    |
|        | Total SCCPs  | 358                        | 363                      | 99%             |                                    |

Table S5. The results of a triplicate recovery experiment containing the three technical MCCP formulations which were extracted, cleaned and analysed in conjunction with the sewage sludge samples. The recoveries were only corrected by the injection standard ( $^{13}\text{C}$ -PCP).

| Sample | CPs         | measured conc.<br>(ng abs) | spiked conc.<br>(ng abs) | recovery<br>(%) | R <sup>2</sup> of<br>deconvolution |
|--------|-------------|----------------------------|--------------------------|-----------------|------------------------------------|
| 1      | MCCP 42%Cl  | 73                         | 159                      | 46%             |                                    |
|        | MCCP 52%Cl  | 177                        | 159                      | 111%            |                                    |
|        | MCCP 57%Cl  | 168                        | 159                      | 105%            |                                    |
|        | Total MCCPs | 417                        | 478                      | 87%             | 0.93                               |
| 2      | MCCP 42%Cl  | 72                         | 159                      | 45%             |                                    |
|        | MCCP 52%Cl  | 179                        | 159                      | 113%            |                                    |
|        | MCCP 57%Cl  | 167                        | 159                      | 105%            |                                    |
|        | Total MCCPs | 419                        | 478                      | 88%             | 0.94                               |
| 3      | MCCP 42%Cl  | 67                         | 159                      | 42%             |                                    |
|        | MCCP 52%Cl  | 122                        | 159                      | 76%             |                                    |
|        | MCCP 57%Cl  | 131                        | 159                      | 82%             |                                    |
|        | Total MCCPs | 320                        | 478                      | 67%             | 0.93                               |

Table S6. The results of a triplicate spike experiment with the three technical MCCP formulations on four different sewage sludge samples. The recovery was calculated by subtracting the values measured in the samples from the spiked samples. The values were only corrected by the injection standard ( $^{13}\text{C}$ -PCP).

| Sample | CPs         | measured conc.<br>(ng abs) | spiked conc.<br>(ng abs) | recovery<br>(%) | R <sup>2</sup> of<br>deconvolution |
|--------|-------------|----------------------------|--------------------------|-----------------|------------------------------------|
| 1      | MCCP 42%Cl  | 48                         | 121                      | 39%             |                                    |
|        | MCCP 52%Cl  | 129                        | 121                      | 107%            |                                    |
|        | MCCP 57%Cl  | 175                        | 121                      | 144%            |                                    |
|        | Total MCCPs | 352                        | 410                      | 86%             | 0.97                               |
| 2      | MCCP 42%Cl  | 0                          | 121                      | 0%              |                                    |
|        | MCCP 52%Cl  | 235                        | 121                      | 194%            |                                    |
|        | MCCP 57%Cl  | 231                        | 121                      | 191%            |                                    |
|        | Total MCCPs | 465                        | 410                      | 113%            | 0.97                               |
| 3      | MCCP 42%Cl  | 50                         | 121                      | 41%             |                                    |
|        | MCCP 52%Cl  | 147                        | 121                      | 121%            |                                    |
|        | MCCP 57%Cl  | 203                        | 121                      | 168%            |                                    |
|        | Total MCCPs | 400                        | 410                      | 98%             | 0.94                               |
| 4      | MCCP 42%Cl  | 64                         | 121                      | 53%             |                                    |
|        | MCCP 52%Cl  | 156                        | 121                      | 129%            |                                    |
|        | MCCP 57%Cl  | 202                        | 121                      | 167%            |                                    |
|        | Total MCCPs | 421                        | 410                      | 103%            | 0.97                               |

Table S7. The results of a triplicate recovery experiment containing the three technical LCCP formulations which were extracted, cleaned and analysed in conjunction with the sewage sludge samples. The recovery was only corrected by the injection standard (13C-PCP).

| Sample | CPs         | measured conc.<br>(ng abs) | spiked conc.<br>(ng abs) | recovery<br>(%) | R <sup>2</sup> of<br>deconvolution |
|--------|-------------|----------------------------|--------------------------|-----------------|------------------------------------|
| 1      | LCCP 36%CI  | 125                        | 144                      | 87%             | 1.00                               |
|        | LCCP 49%CI  | 164                        | 144                      | 113%            |                                    |
|        | Total LCCPs | 289                        | 289                      | 100%            |                                    |
| 2      | LCCP 36%CI  | 112                        | 144                      | 77%             | 1.00                               |
|        | LCCP 49%CI  | 158                        | 144                      | 110%            |                                    |
|        | Total LCCPs | 270                        | 289                      | 94%             |                                    |
| 3      | LCCP 36%CI  | 90                         | 144                      | 63%             | 1.00                               |
|        | LCCP 49%CI  | 144                        | 144                      | 100%            |                                    |
|        | Total LCCPs | 234                        | 289                      | 81%             |                                    |

Table S8. The results of a triplicate spike experiment with the three technical MCCP formulations on four different sewage sludge samples. The recovery was calculated by subtracting the values measured in the samples from the spiked samples. The values were only corrected by the injection standard (13C-PCP).

| Sample | CPs         | measured conc.<br>(ng abs) | spiked conc.<br>(ng abs) | recovery<br>(%) | R <sup>2</sup> of<br>deconvolution |
|--------|-------------|----------------------------|--------------------------|-----------------|------------------------------------|
| 1      | LCCP 36%CI  | 89                         | 121                      | 73%             | 1.00                               |
|        | LCCP 49%CI  | 156                        | 121                      | 129%            |                                    |
|        | Total LCCPs | 245                        | 247                      | 99%             |                                    |
| 2      | LCCP 36%CI  | 99                         | 121                      | 82%             | 0.54                               |
|        | LCCP 49%CI  | 203                        | 121                      | 168%            |                                    |
|        | Total LCCPs | 302                        | 247                      | 122%            |                                    |
| 3      | LCCP 36%CI  | 103                        | 121                      | 85%             | 1.00                               |
|        | LCCP 49%CI  | 186                        | 121                      | 153%            |                                    |
|        | Total LCCPs | 288                        | 247                      | 117%            |                                    |
| 4      | LCCP 36%CI  | 114                        | 121                      | 94%             | 1.00                               |
|        | LCCP 49%CI  | 191                        | 121                      | 158%            |                                    |
|        | Total LCCPs | 304                        | 247                      | 123%            |                                    |



Table S9. Average peak area of the SCCPs and MCCPS of an 8-fold measurement of sewage sludge sample S9.

| SCCPs                   | average peak area | std  | rel std (%) | MCCPs                    | average peak area | std  | rel std (%) |
|-------------------------|-------------------|------|-------------|--------------------------|-------------------|------|-------------|
| C10C14                  |                   |      |             | C14C14                   | 259               | 71   | 27%         |
| C10C15                  | 207               | 94   | 45%         | C14C15                   | 36194             | 1846 | 5%          |
| C10C16                  | 6762              | 1135 | 17%         | C14C16                   | 158432            | 4039 | 3%          |
| C10C17                  | 1541              | 284  | 18%         | C14C17                   | 182620            | 4305 | 2%          |
| C10C18                  | 475               | 222  | 47%         | C14C18                   | 82817             | 4211 | 5%          |
| C10C19                  |                   |      |             | C14C19                   | 24836             | 1670 | 7%          |
| C10C110                 |                   |      |             | C14C110                  | 4936              | 654  | 13%         |
| <b>Total C10 RSD(%)</b> |                   |      |             | C14C111                  |                   |      |             |
|                         |                   |      |             | C14C112                  |                   |      |             |
| C11C14                  |                   |      |             | C14C113                  |                   |      |             |
| C11C15                  |                   |      |             | C14C114                  |                   |      |             |
| C11C16                  | 5119              | 565  | 11%         | <b>Total C14 RSD (%)</b> |                   |      | <b>9%</b>   |
| C11C17                  | 5538              | 440  | 8%          | C15C14                   | 195               | 69   | 35%         |
| C11C18                  | 2217              | 322  | 15%         | C15C15                   | 25884             | 2272 | 9%          |
| C11C19                  | 1001              | 283  | 28%         | C15C16                   | 112266            | 6551 | 6%          |
| C11C110                 |                   |      |             | C15C17                   | 151734            | 2519 | 2%          |
| C11C111                 |                   |      |             | C15C18                   | 73103             | 2173 | 3%          |
| <b>Total C11 RSD(%)</b> |                   |      |             | C15C19                   | 26543             | 731  | 3%          |
|                         |                   |      |             | C15C110                  | 4873              | 1041 | 21%         |
| C12C14                  |                   |      |             | C15C111                  | 686               | 236  | 34%         |
| C12C15                  | 650               | 264  | 41%         | C15C112                  |                   |      |             |
| C12C16                  | 7719              | 787  | 10%         | C15C113                  |                   |      |             |
| C12C17                  | 10495             | 837  | 8%          | C15C114                  |                   |      |             |
| C12C18                  | 4538              | 244  | 5%          | C15C115                  |                   |      |             |
| C12C19                  | 963               | 301  | 31%         | <b>Total C15 RSD (%)</b> |                   |      | <b>14%</b>  |
| C12C110                 |                   |      |             | C16C14                   | 113               | 14   | 12%         |
| C12C111                 |                   |      |             | C16C15                   | 3385              | 475  | 14%         |
| C12C112                 |                   |      |             | C16C16                   | 40224             | 1957 | 5%          |
| <b>Total C10 RSD(%)</b> |                   |      |             | C16C17                   | 56293             | 1689 | 3%          |
|                         |                   |      |             | C16C18                   | 35680             | 769  | 2%          |
| C13C14                  |                   |      |             | C16C19                   | 14072             | 605  | 4%          |
| C13C15                  | 2025              | 567  | 28%         | C16C110                  | 2751              | 264  | 10%         |
| C13C16                  | 17022             | 592  | 3%          | C16C111                  |                   |      |             |
| C13C17                  | 22099             | 1137 | 5%          | C16C112                  |                   |      |             |
| C13C18                  | 10307             | 831  | 8%          | C16C113                  |                   |      |             |
| C13C19                  | 1951              | 319  | 16%         | C16C114                  |                   |      |             |
| C13C110                 | 504               | 145  | 29%         | C16C115                  |                   |      |             |
| C13C111                 |                   |      |             | C16C116                  |                   |      |             |
| C13C112                 |                   |      |             | <b>Total C16 RSD (%)</b> |                   |      | <b>7%</b>   |
| C13C113                 |                   |      |             | C17C14                   | 167               | 37   | 22%         |
| <b>Total C10 RSD(%)</b> |                   |      |             | C17C15                   | 4212              | 641  | 15%         |
|                         |                   |      |             | C17C16                   | 18980             | 1625 | 9%          |
| overall RSD             |                   |      | 20%         | C17C17                   | 25902             | 3158 | 12%         |
|                         |                   |      |             | C17C18                   | 20418             | 1045 | 5%          |
|                         |                   |      |             | C17C19                   | 10159             | 512  | 5%          |
|                         |                   |      |             | C17C110                  | 2340              | 260  | 11%         |
|                         |                   |      |             | C17C111                  | 249               | 99   | 40%         |
|                         |                   |      |             | C17C112                  |                   |      |             |
|                         |                   |      |             | C17C113                  |                   |      |             |
|                         |                   |      |             | C17C114                  |                   |      |             |
|                         |                   |      |             | C17C115                  |                   |      |             |
|                         |                   |      |             | C17C116                  |                   |      |             |
|                         |                   |      |             | C17C117                  |                   |      |             |
|                         |                   |      |             | <b>Total C17 RSD (%)</b> |                   |      | <b>15%</b>  |
|                         |                   |      |             | overall RSD              |                   |      | 11%         |

Table S10. list of m/z ratios considered for CPs.

| SCCP<br>congener | m/z of [M+Cl] <sup>-</sup> | MCCP<br>congener | m/z of [M+Cl] <sup>-</sup> | MCCP<br>congener | m/z of [M+Cl] <sup>-</sup> |
|------------------|----------------------------|------------------|----------------------------|------------------|----------------------------|
| C10Cl4           | 314.9817                   | C14Cl4           | 371.0448                   | C16Cl15          | 776.6415                   |
| C10Cl4           | 316.9792                   | C14Cl4           | 373.0418                   | C16Cl15          | 778.6385                   |
| C10Cl5           | 348.9432                   | C14Cl5           | 405.0058                   | C16Cl16          | 810.6025                   |
| C10Cl5           | 350.9403                   | C14Cl5           | 407.0029                   | C16Cl16          | 812.5996                   |
| C10Cl6           | 382.9042                   | C14Cl6           | 438.9668                   | C17Cl4           | 413.0917                   |
| C10Cl6           | 384.9013                   | C14Cl6           | 440.9639                   | C17Cl4           | 415.0888                   |
| C10Cl7           | 416.8653                   | C14Cl7           | 472.9279                   | C17Cl5           | 447.0528                   |
| C10Cl7           | 418.8623                   | C14Cl7           | 474.9249                   | C17Cl5           | 449.0498                   |
| C10Cl8           | 450.8263                   | C14Cl8           | 506.8889                   | C17Cl6           | 481.0138                   |
| C10Cl8           | 452.8233                   | C14Cl8           | 508.8859                   | C17Cl6           | 483.0108                   |
| C10Cl9           | 486.7844                   | C14Cl9           | 542.8470                   | C17Cl7           | 514.9748                   |
| C10Cl9           | 488.7814                   | C14Cl9           | 544.8440                   | C17Cl7           | 516.9719                   |
| C10Cl10          | 520.7454                   | C14Cl10          | 576.8080                   | C17Cl8           | 548.9358                   |
| C10Cl10          | 522.7424                   | C14Cl10          | 578.8050                   | C17Cl8           | 550.9329                   |
| C11Cl4           | 328.9978                   | C14Cl11          | 610.7690                   | C17Cl9           | 584.8939                   |
| C11Cl4           | 330.9949                   | C14Cl11          | 612.7661                   | C17Cl9           | 586.8910                   |
| C11Cl5           | 362.9589                   | C14Cl12          | 644.7300                   | C17Cl10          | 618.8549                   |
| C11Cl5           | 364.9559                   | C14Cl12          | 646.7271                   | C17Cl10          | 620.8520                   |
| C11Cl6           | 396.9199                   | C14Cl13          | 680.6881                   | C17Cl11          | 654.8130                   |
| C11Cl6           | 398.9169                   | C14Cl13          | 682.6852                   | C17Cl11          | 652.8160                   |
| C11Cl7           | 430.8809                   | C14Cl14          | 714.6492                   | C17Cl12          | 686.7770                   |
| C11Cl7           | 432.8780                   | C14Cl14          | 716.6462                   | C17Cl12          | 688.7740                   |
| C11Cl8           | 464.8419                   | C15Cl4           | 385.0604                   | C17Cl13          | 722.7351                   |
| C11Cl8           | 466.8390                   | C15Cl4           | 387.0575                   | C17Cl13          | 724.7321                   |
| C11Cl9           | 500.8000                   | C15Cl5           | 419.0215                   | C17Cl14          | 756.6961                   |
| C11Cl9           | 502.7971                   | C15Cl5           | 421.0185                   | C17Cl14          | 758.6932                   |
| C11Cl10          | 534.7610                   | C15Cl6           | 452.9825                   | C17Cl15          | 790.6571                   |
| C11Cl10          | 536.7581                   | C15Cl6           | 454.9795                   | C17Cl15          | 792.6542                   |
| C11Cl11          | 568.7221                   | C15Cl7           | 486.9435                   | C17Cl16          | 824.6182                   |
| C11Cl11          | 570.7191                   | C15Cl7           | 488.9406                   | C17Cl16          | 826.6152                   |
| C12Cl4           | 343.0135                   | C15Cl8           | 520.9045                   | C17Cl17          | 860.5762                   |
| C12Cl4           | 345.0105                   | C15Cl8           | 522.9016                   | C17Cl17          | 862.5733                   |
| C12Cl5           | 376.9745                   | C15Cl9           | 556.8626                   |                  |                            |
| C12Cl5           | 378.9716                   | C15Cl9           | 558.8597                   |                  |                            |
| C12Cl6           | 410.9355                   | C15Cl10          | 590.8236                   |                  |                            |
| C12Cl6           | 412.9326                   | C15Cl10          | 592.8207                   |                  |                            |
| C12Cl7           | 444.8966                   | C15Cl11          | 624.7847                   |                  |                            |
| C12Cl7           | 446.8936                   | C15Cl11          | 626.7817                   |                  |                            |
| C12Cl8           | 478.8576                   | C15Cl12          | 658.7457                   |                  |                            |
| C12Cl8           | 480.8546                   | C15Cl12          | 660.7427                   |                  |                            |
| C12Cl9           | 514.8157                   | C15Cl13          | 694.7038                   |                  |                            |
| C12Cl9           | 516.8127                   | C15Cl13          | 696.7008                   |                  |                            |
| C12Cl10          | 548.7767                   | C15Cl14          | 728.6648                   |                  |                            |
| C12Cl10          | 550.7737                   | C15Cl14          | 730.6619                   |                  |                            |
| C12Cl11          | 582.7377                   | C15Cl15          | 762.6258                   |                  |                            |
| C12Cl11          | 584.7348                   | C15Cl15          | 764.6229                   |                  |                            |
| C12Cl12          | 618.6958                   | C16Cl4           | 399.0761                   |                  |                            |
| C12Cl12          | 620.6928                   | C16Cl4           | 401.0731                   |                  |                            |
| C13Cl4           | 357.0291                   | C16Cl5           | 433.0371                   |                  |                            |
| C13Cl4           | 359.0262                   | C16Cl5           | 435.0342                   |                  |                            |
| C13Cl5           | 390.9902                   | C16Cl6           | 466.9981                   |                  |                            |
| C13Cl5           | 392.9872                   | C16Cl6           | 468.9952                   |                  |                            |
| C13Cl6           | 424.9512                   | C16Cl7           | 500.9592                   |                  |                            |
| C13Cl6           | 426.9482                   | C16Cl7           | 502.9562                   |                  |                            |
| C13Cl7           | 458.9122                   | C16Cl8           | 534.9202                   |                  |                            |
| C13Cl7           | 460.9093                   | C16Cl8           | 536.9172                   |                  |                            |
| C13Cl8           | 492.8732                   | C16Cl9           | 570.8783                   |                  |                            |
| C13Cl8           | 494.8703                   | C16Cl9           | 572.8753                   |                  |                            |
| C13Cl9           | 528.8313                   | C16Cl10          | 604.8393                   |                  |                            |
| C13Cl9           | 530.8284                   | C16Cl10          | 606.8363                   |                  |                            |
| C13Cl10          | 562.7923                   | C16Cl11          | 638.8003                   |                  |                            |
| C13Cl10          | 564.7894                   | C16Cl11          | 640.7974                   |                  |                            |
| C13Cl11          | 596.7534                   | C16Cl12          | 672.7613                   |                  |                            |
| C13Cl11          | 598.7504                   | C16Cl12          | 674.7584                   |                  |                            |
| C13Cl12          | 630.7144                   | C16Cl13          | 708.7194                   |                  |                            |
| C13Cl12          | 632.7114                   | C16Cl13          | 710.7165                   |                  |                            |
| C13Cl13          | 666.6725                   | C16Cl14          | 742.6805                   |                  |                            |
| C13Cl13          | 668.6695                   | C16Cl14          | 744.6775                   |                  |                            |



Figure S1. Composition profile of the SCCPs, MCCPS and LCCPs congeners in the 15 sewage sludge samples and the 2 blanks.

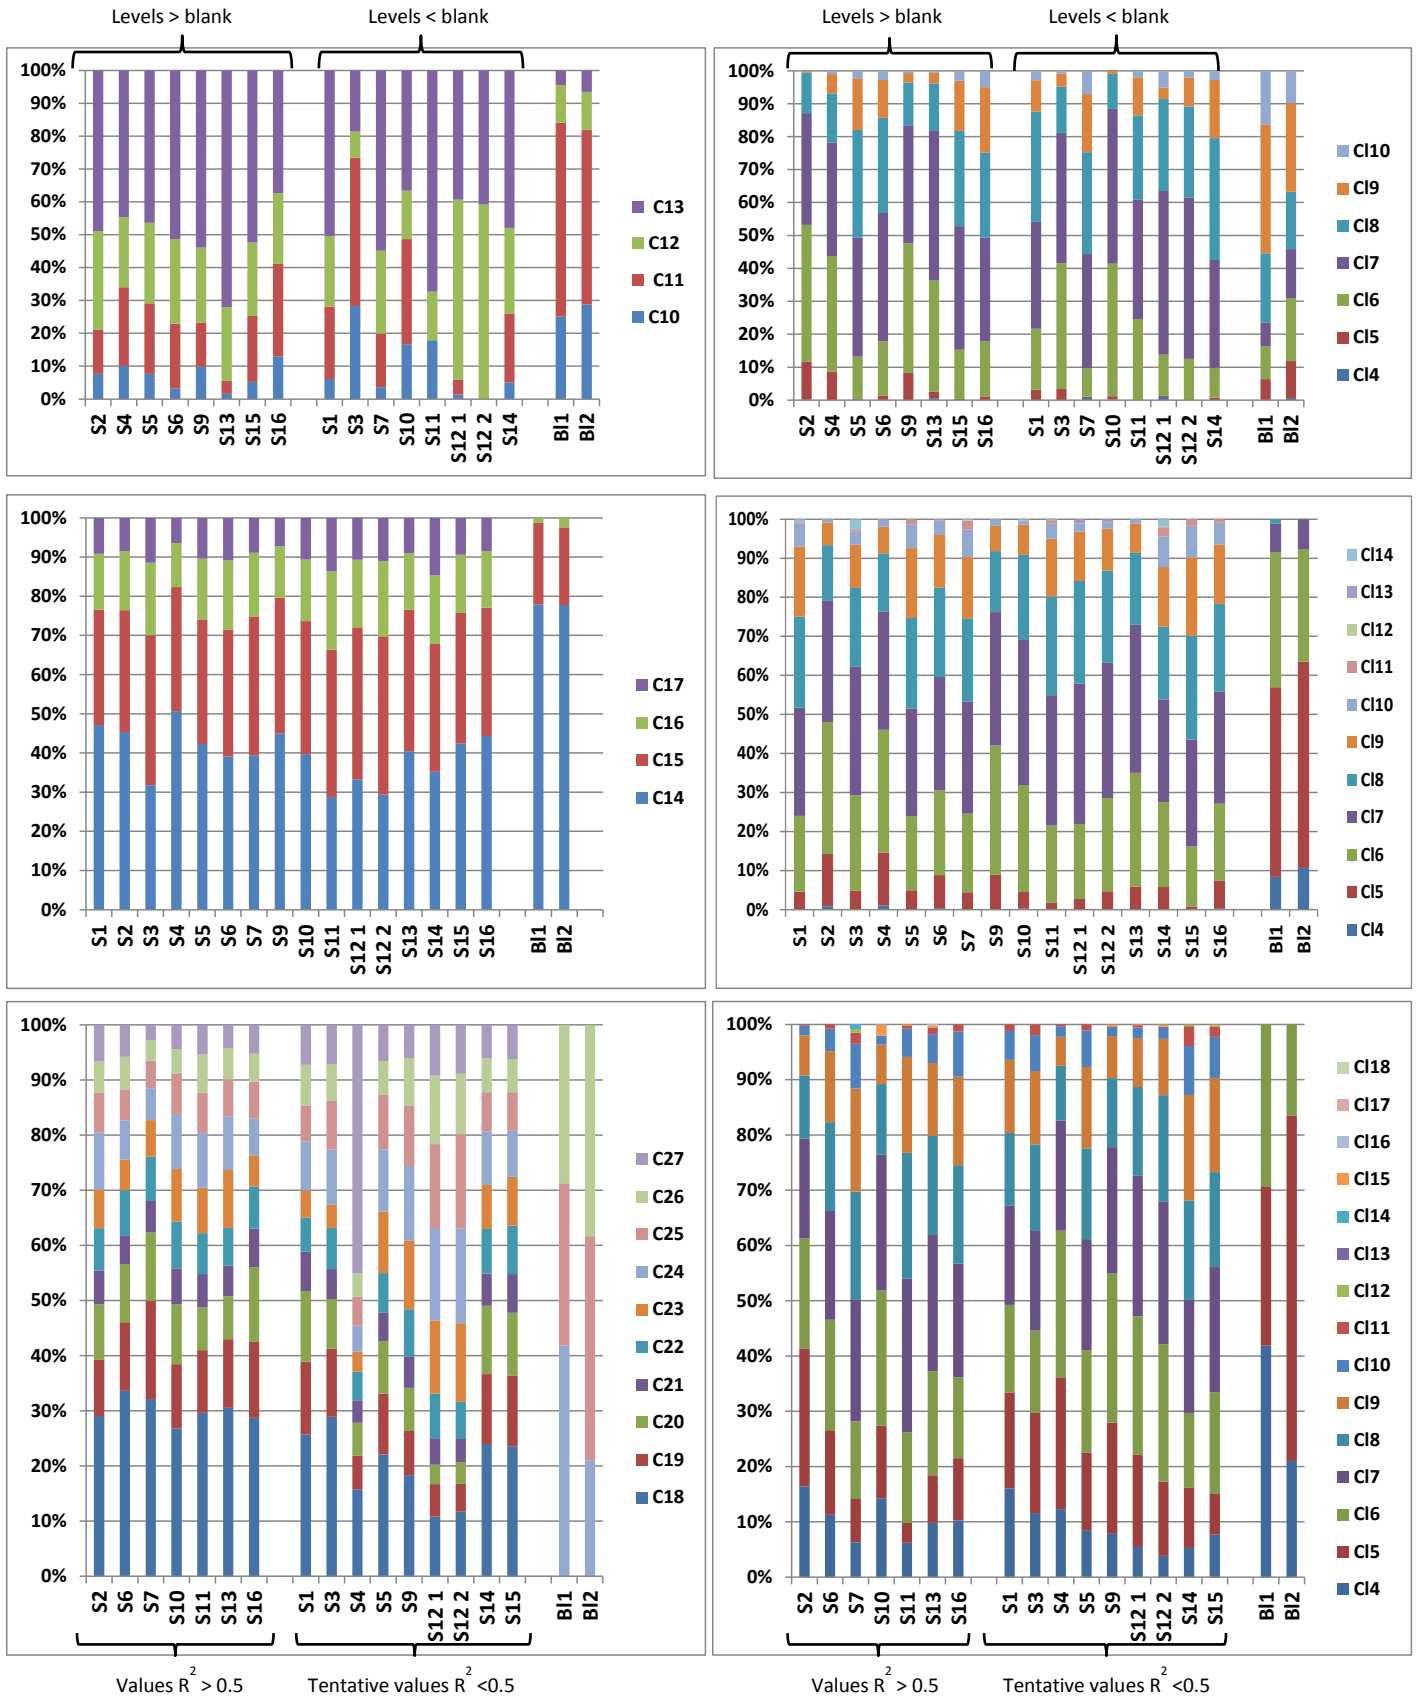

Figure S2. Congener pattern of the three SCCPs technical mixtures.

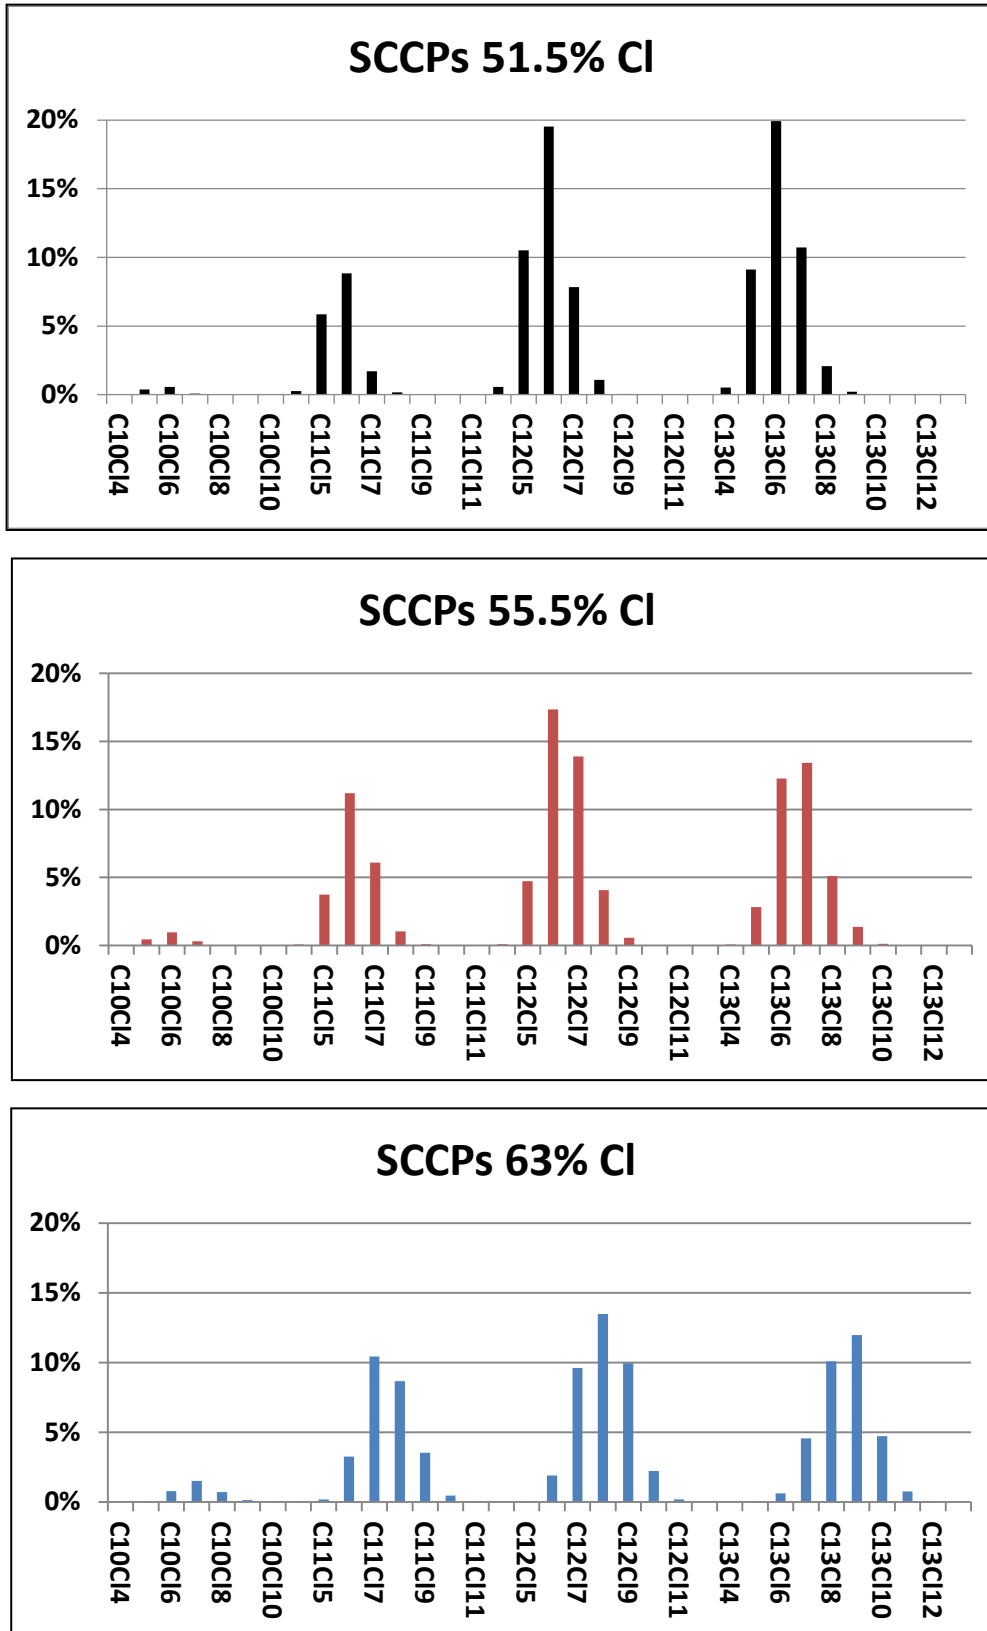

Figure S3. Congener pattern of the three MCCPs technical mixtures.

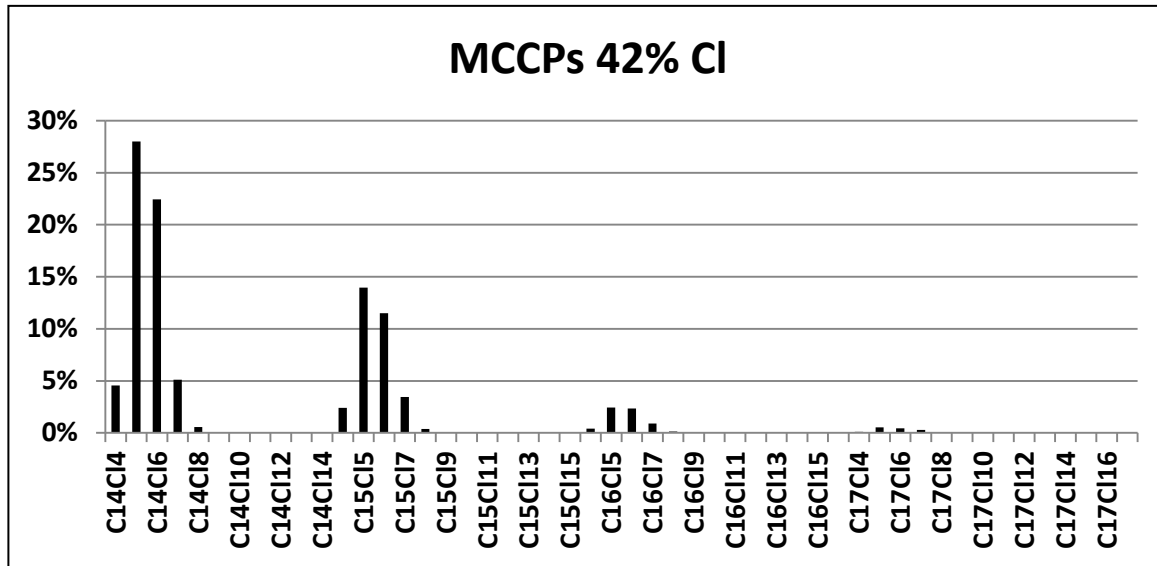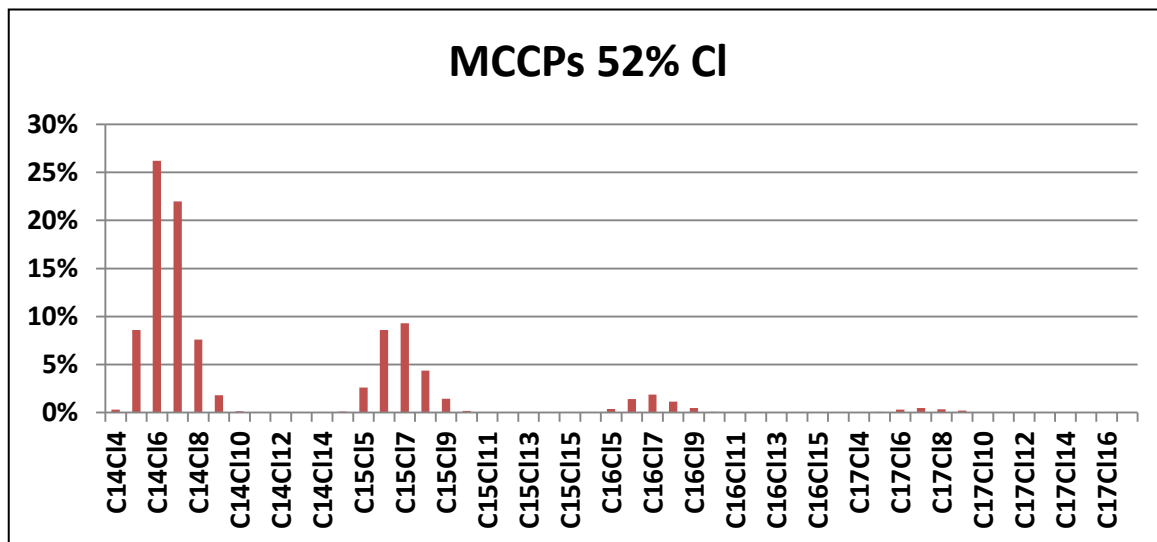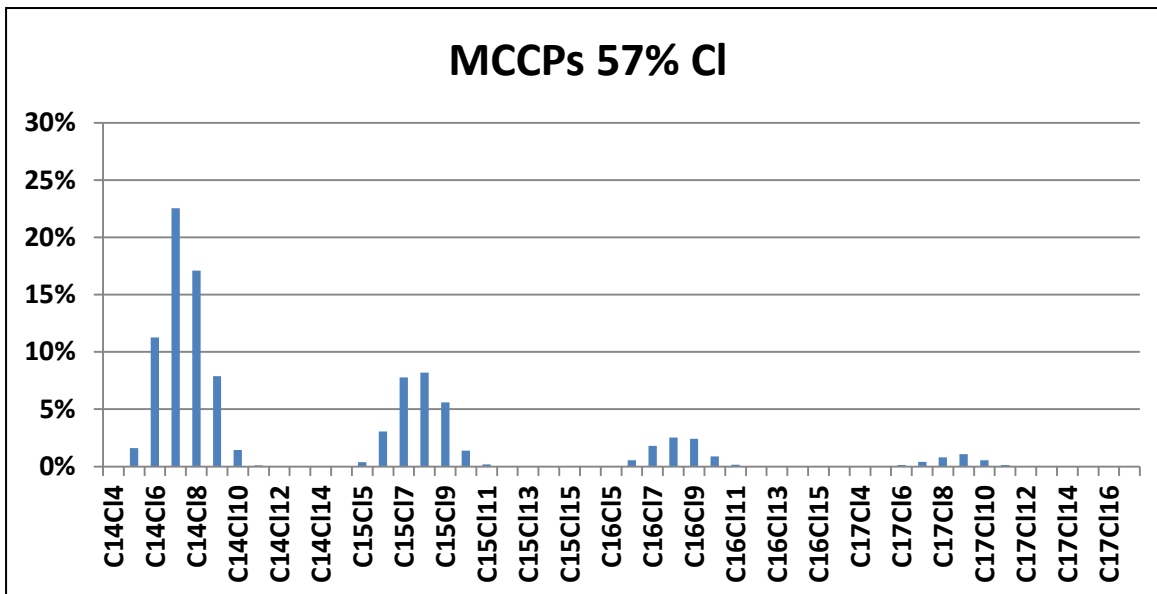

Figure S4. Congener pattern of the two LCCPs technical mixtures.

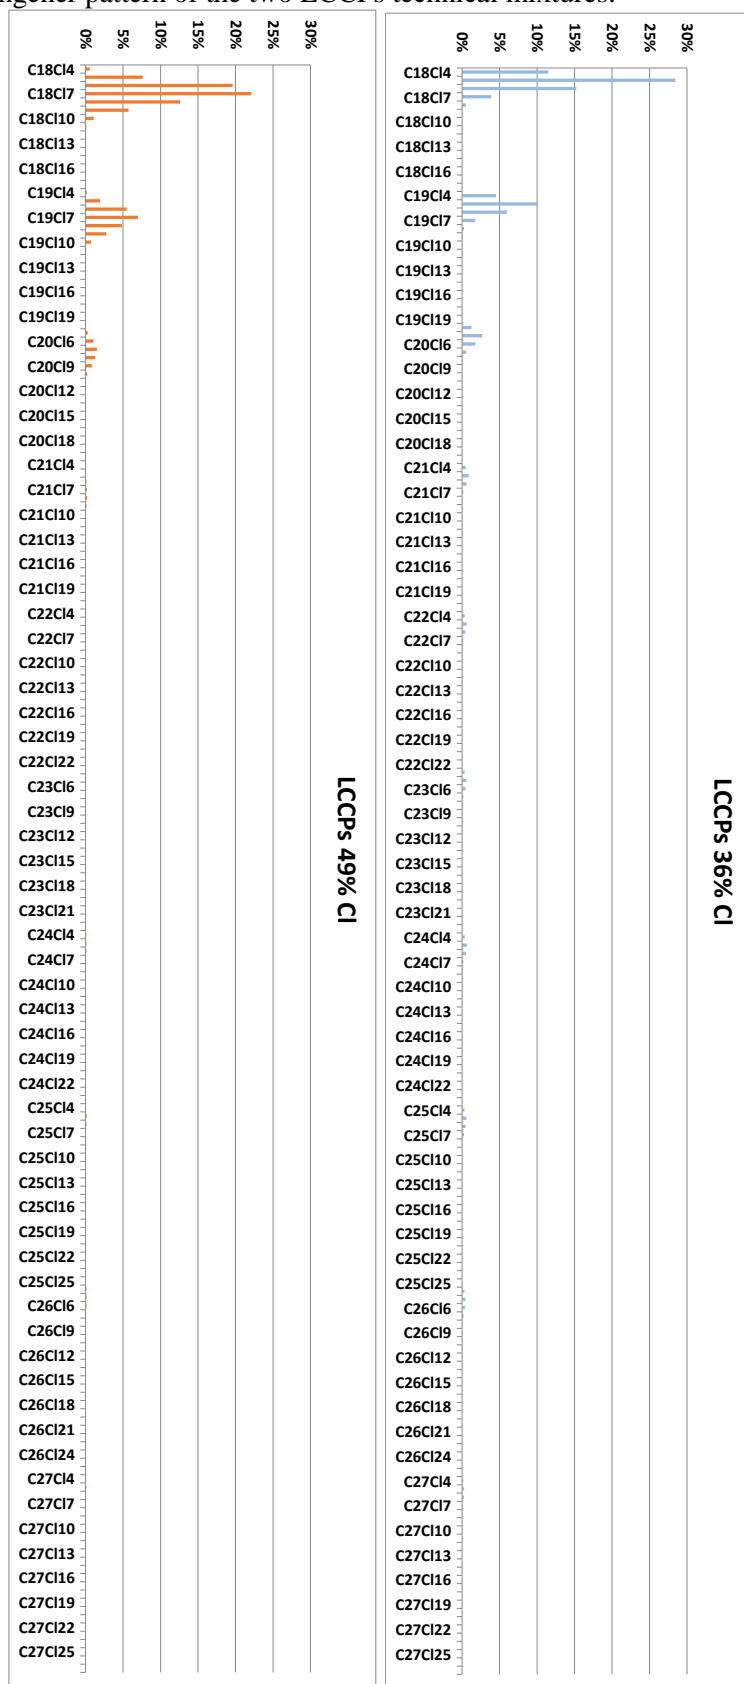

Figure S5. Example of the measured and deconvoluted congener pattern of SCCPs in the sewage sludge sample S1.

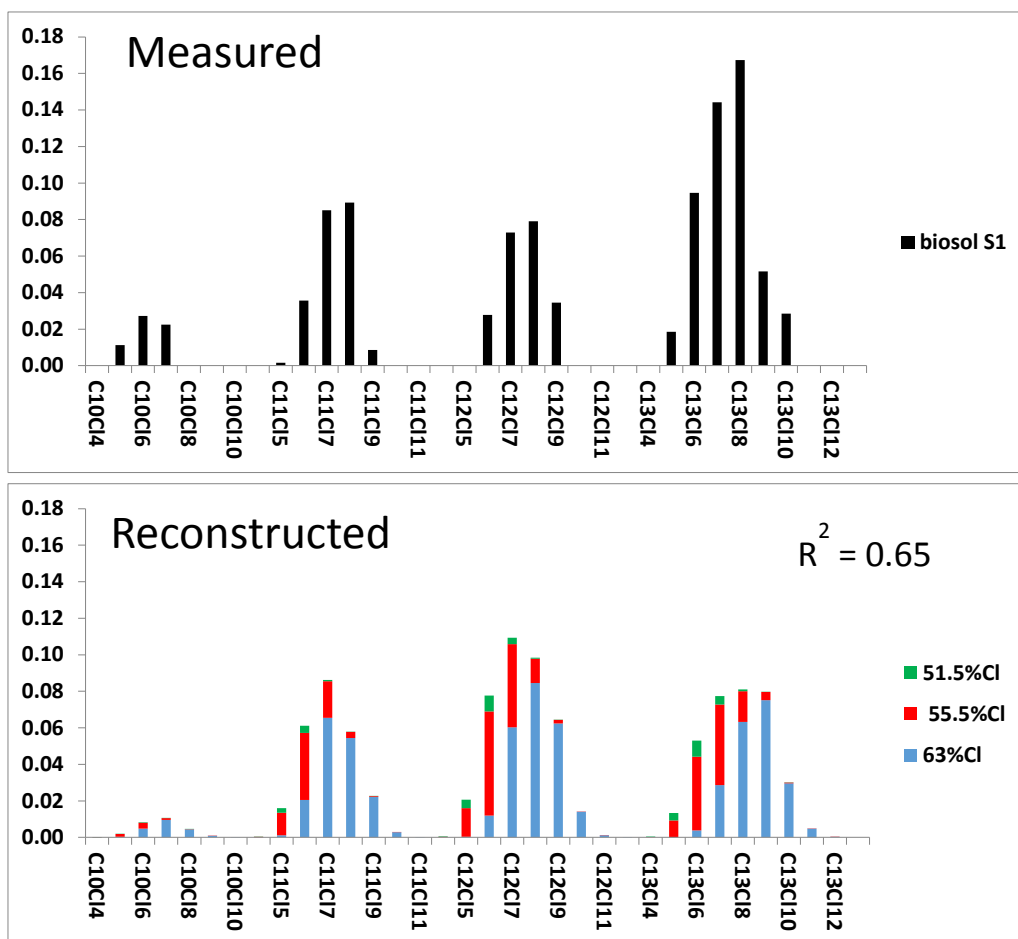



Figure S6. Example of the measured and deconvoluted congener pattern of MCCPs in the sewage sludge sample S3.

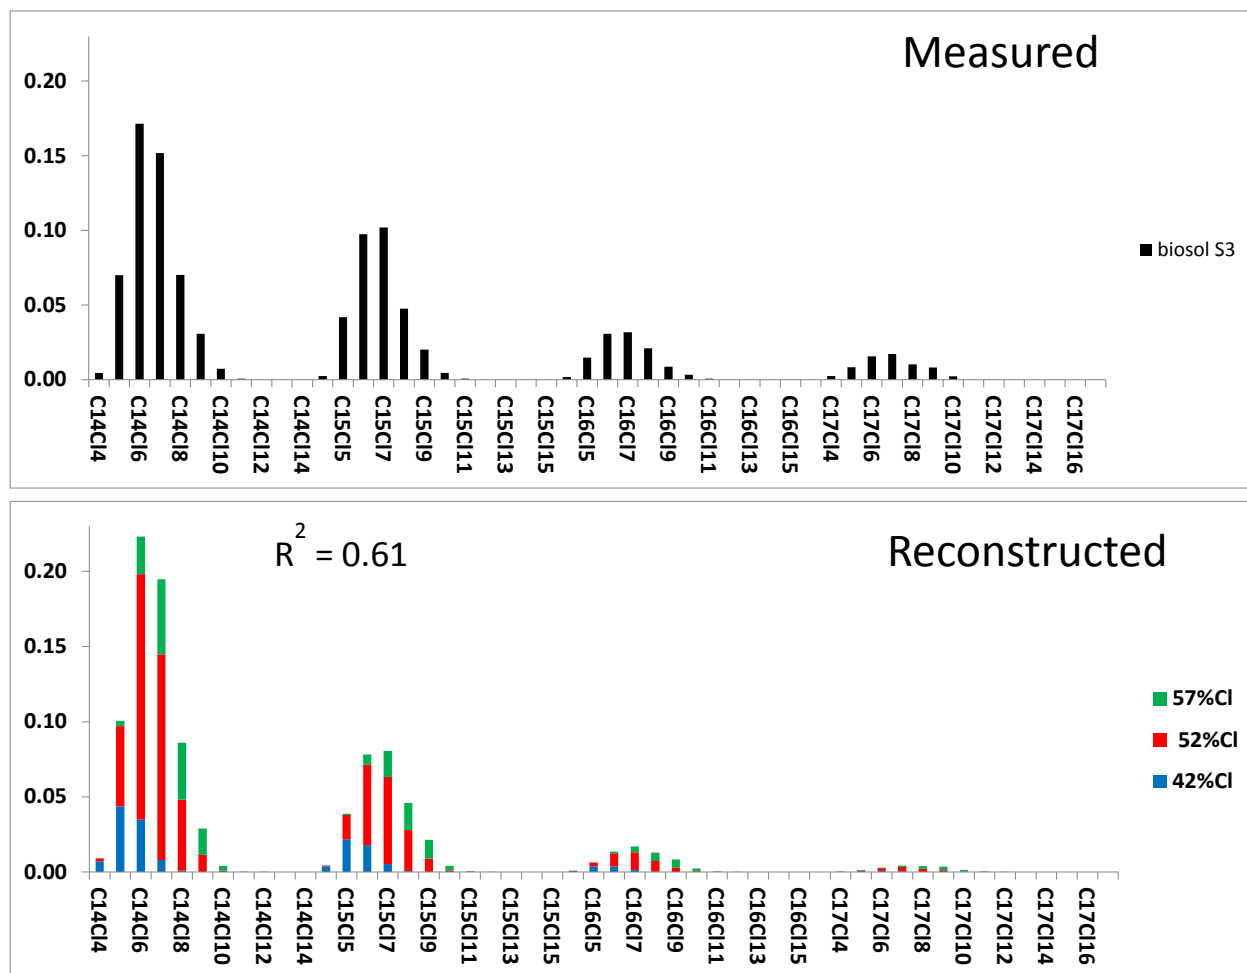

Figure S7. Example of the measured and deconvoluted congener pattern of LCCPs in the sewage sludge sample S6.

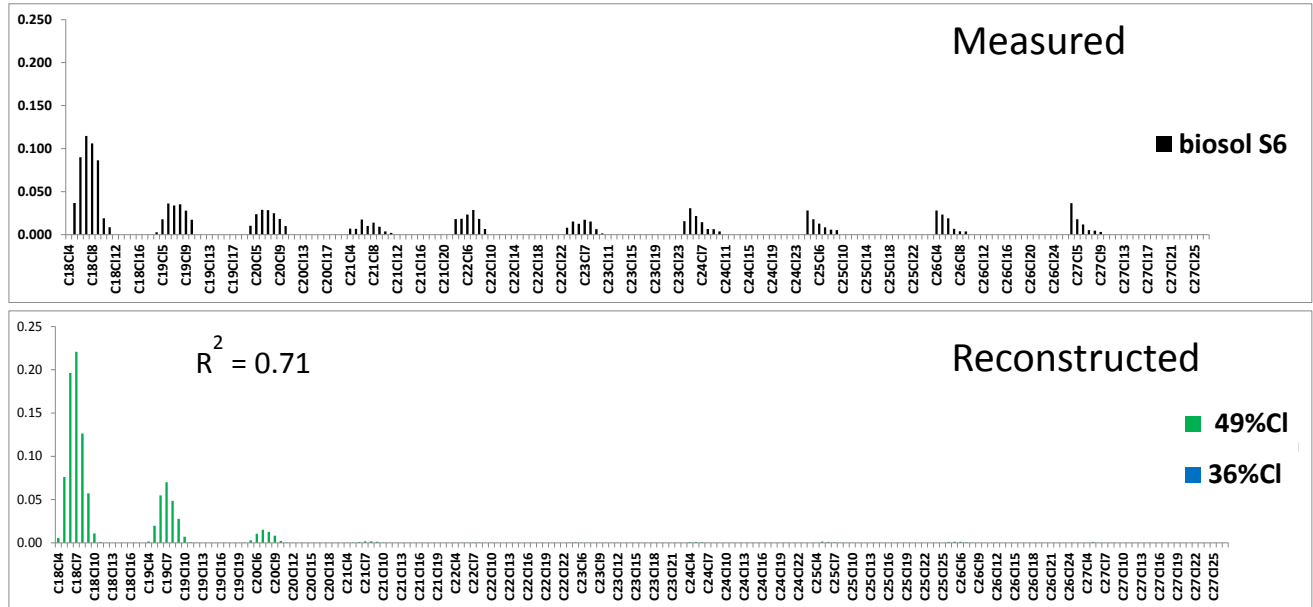

**Reference**

O'Brien, J.W., Thai, P.K., Eaglesham, G., Ort, C., Scheidegger, A., Carter, S., Yin Lai, F., Mueller, J.F., 2014. A Model to Estimate the Population Contributing to the Wastewater Using Samples Collected on Census Day. *Environ. Sci. Technol.*, 48, 517-525.
